# Supplementary material for: Influence of Surface Properties of Nanostructured Ceria-Based Catalysts on Their Stability Performance
Source: MDPI journal article supplement (doi:10.3390/nano12030392), 2022-01-25
Supplement: s1 [file s1]

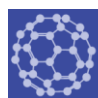

## Supplementary Materials

# Influence of Surface Properties of Nanostructured Ceria-Based Catalysts on Their Stability Performance

Boyun Li <sup>1</sup>, Eric Croiset <sup>1</sup> and John Z. Wen <sup>2,\*</sup>

<sup>1</sup> Department of Chemical Engineering, University of Waterloo, Waterloo, ON N2L3G1, Canada; b264li@uwaterloo.ca (B.L.); ecroiset@uwaterloo.ca (E.C.)

<sup>2</sup> Department of Mechanical & Mechatronics Engineering, University of Waterloo, Waterloo, ON N2L3G1, Canada

\* Correspondence: john.wen@uwaterloo.ca; Tel: +1-519-888-4567 ext.38362

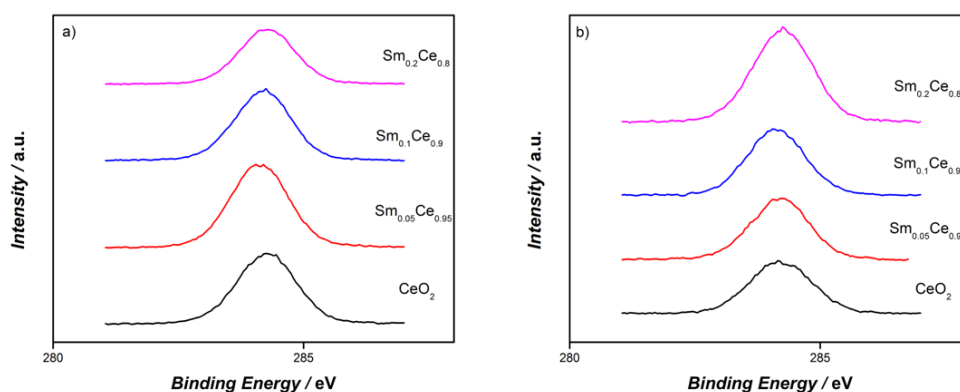

Figure S1. C1s spectra for all catalysts.

Table S1. Peak position of Ce 3d spectra for fresh and spent catalysts.

|                 |                                       | v0      | v       | v1      | v2      | v3      | u0      | u       | u1      | u2      | u3      |
|-----------------|---------------------------------------|---------|---------|---------|---------|---------|---------|---------|---------|---------|---------|
|                 |                                       | BE (eV) |
| Fresh Catalysts | CeO <sub>2</sub>                      | 879.8   | 882.4   | 885.1   | 888.7   | 898.6   | 898.3   | 900.9   | 903.4   | 907.5   | 917.0   |
|                 | Sm <sub>0.05</sub> Ce <sub>0.95</sub> | 879.9   | 882.3   | 885.0   | 888.8   | 898.5   | 898.2   | 900.8   | 903.3   | 907.5   | 916.8   |
|                 | Sm <sub>0.1</sub> Ce <sub>0.9</sub>   | 880.1   | 882.2   | 884.6   | 888.5   | 898.6   | 898.2   | 900.7   | 903.0   | 907.4   | 916.8   |
|                 | Sm <sub>0.2</sub> Ce <sub>0.8</sub>   | 880.2   | 882.2   | 884.3   | 888.5   | 898.7   | 898.3   | 900.6   | 902.4   | 907.1   | 916.7   |
| Spent Catalysts | CeO <sub>2</sub>                      | 880.1   | 882.4   | 884.6   | 888.6   | 898.7   | 898.2   | 900.9   | 903.0   | 907.6   | 917.0   |
|                 | Sm <sub>0.05</sub> Ce <sub>0.95</sub> | 880.2   | 882.4   | 884.6   | 888.7   | 898.6   | 898.2   | 900.8   | 902.9   | 907.4   | 916.9   |
|                 | Sm <sub>0.1</sub> Ce <sub>0.9</sub>   | 880.2   | 882.4   | 884.5   | 888.7   | 898.7   | 898.3   | 901.0   | 902.8   | 907.7   | 917.1   |
|                 | Sm <sub>0.2</sub> Ce <sub>0.8</sub>   | 880.1   | 882.3   | 884.8   | 888.6   | 898.7   | 898.2   | 900.9   | 903.2   | 907.6   | 916.9   |
